# Supplementary material
Source: PubMed Central journal article supplement (PMC2864026)
Supplement: NIHMS197168-supplement-S__Fig__1.pdf [file NIHMS197168-supplement-S__Fig__1.pdf]

# Supplementary Figure 1

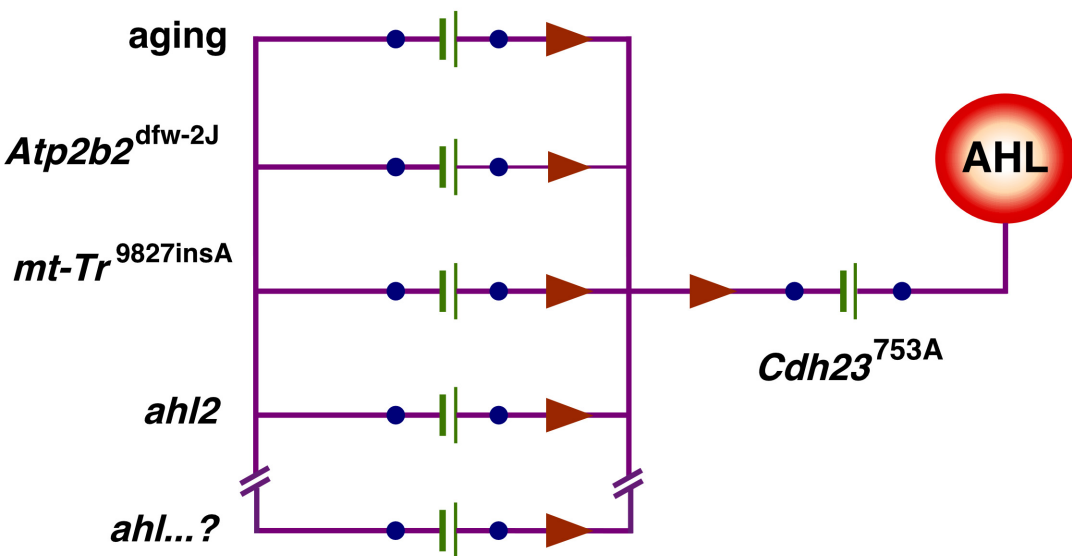

## Genetic architecture of mouse AHL.

The *Cdh23*<sup>753G/A</sup> dimorphism is a major regulator of hearing thresholds in 56 inbred strains. At homozygous state, *Cdh23*<sup>753A</sup> predisposes to hearing loss in 27 inbred strains. Manifestation of early-onset AHL is accelerated by either one of the secondary genetic factors (listed on the left) in combination with *Cdh23*<sup>753A</sup>. General aging processes, environmental or stochastic effects may account for variation within and among strains with late-onset hearing loss.
