# Supplementary material
Source: PubMed Central journal article supplement (PMC2864026)
Supplement: NIHMS197168-supplement-S__Table_1.pdf [file NIHMS197168-supplement-S__Table_1.pdf]

# Supplementary Table 1

## Association of *Cdh23*<sup>753G/A</sup> allele status with AHL

| Locus                              | AHL <sup>+</sup> | AHL <sup>-</sup> | X <sup>2</sup> | <i>p</i>              | map position |
|------------------------------------|------------------|------------------|----------------|-----------------------|--------------|
| <i>D10Ntra57(T)</i>                | 31               | 19               | 1.44           | 0.23                  | 60 021 029   |
| <i>D10Ntra42(C)</i>                | 31               | 19               | 1.44           | 0.23                  | 60 096 260   |
| <i>Cdh23</i> <sup>10497del11</sup> | 29               | 25               | 0.03           | 0.86                  | 60 304 502   |
| <i>Cdh23</i> <sup>INS7+117A</sup>  | 31               | 21               | 0.64           | 0.42                  | 60 534 518   |
| <i>Cdh23</i> <sup>753A</sup>       | 27               | 3                | 18.14          | 2.0x10 <sup>-05</sup> | 60 534 635   |
| <i>Cdh23</i> <sup>685A</sup>       | 31               | 16               | 3.24           | 0.072                 | 60 534 703   |
| <i>D10Ntra46(TG)</i>               | 31               | 17               | 2.56           | 0.10                  | 60 650 426   |
| <i>D10Ntra48(A)</i>                | 31               | 19               | 1.44           | 0.23                  | 60 710 973   |

Marker allele frequency in 31 AHL-positive (AHL<sup>+</sup>) and 25 AHL-negative (AHL<sup>-</sup>) strains, *p* value of associated test statistic and location in Mb on chromosome 10.
