# Supplementary material
Source: PubMed Central journal article supplement (PMC2864026)
Supplement: NIHMS197168-supplement-S__Table_2.pdf [file NIHMS197168-supplement-S__Table_2.pdf]

## Supplementary Table 2

### Haplotypes across *ahl* interval derived from 57 common inbred strains

|                        | Ahl <sup>+</sup> | D10Ntra57   | D10Ntra42 | Cdh23 <sup>10497del11</sup> | Cdh23 <sup>INS7+117</sup> | Cdh23 <sup>753</sup> | Cdh23 <sup>685</sup> | D10Ntra46 | D10Ntra48   |
|------------------------|------------------|-------------|-----------|-----------------------------|---------------------------|----------------------|----------------------|-----------|-------------|
| V/LE                   | na               | ...C...G... | ...G...   | ...CCCCGCGTCGG...           | ...A...                   | ...G...              | ...G...              | ...CA...  | ...G...T... |
| CZECHII/Ei             | -                | ...C...G... | ...T...   | ...CCCCGCGTCGG...           | ...A...                   | ...G...              | ...G...              | ...CA...  | ...G...T... |
| MOLF/Ei                | -                | ...C...G... | ...T...   | ...CCCCGCGTCGG...           | ...A...                   | ...G...              | ...G...              | ...CA...  | ...G...T... |
| MOLG/Dn                | -                | ...C...G... | ...T...   | ...CCCCGCGTCGG...           | ...A...                   | ...G...              | ...G...              | ...CA...  | ...G...T... |
| MOLD/Rk                | -                | ...C...G... | ...T...   | ...CCCCGCGTCGG...           | ...A...                   | ...G...              | ...G...              | ...CA...  | ...G...T... |
| CAST/Ei                | -                | ...C...G... | ...T...   | ...CCCCGCGTCGG...           | ...A...                   | ...G...              | ...G...              | ...CG...  | ...G...T... |
| CE/J*                  | -                | ...T...A... | ...C...   | ...CCCCGCGTCGG...           | ...G...                   | ...G...              | ...G...              | ...TG...  | ...G...T... |
| PERC/Ei                | -                | ...T...A... | ...C...   | ...CCCCGCGTCGG...           | ...G...                   | ...G...              | ...G...              | ...CG...  | ...A...C... |
| SF/CamEi               | -                | ...T...A... | ...C...   | ...CCCCGCGTCGG...           | ...G...                   | ...G...              | ...G...              | ...TG...  | ...A...C... |
| LG/J                   | -                | ...C...G... | ...C...   | ...CCCCGCGTCGG...           | ...G...                   | ...G...              | ...G...              | ...CG...  | ...A...C... |
| C3H/HeJ                | -                | ...T...A... | ...C...   | ...CCCCGCGTCGG...           | ...A...                   | ...G...              | ...A...              | ...TG...  | ...A...C... |
| CBA/CaJ                | -                | ...T...A... | ...C...   | ...CCCCGCGTCGG...           | ...A...                   | ...G...              | ...A...              | ...TG...  | ...A...C... |
| C3HeB/FeJ              | -                | ...T...A... | ...C...   | ...CCCCGCGTCGG...           | ...A...                   | ...G...              | ...A...              | ...TG...  | ...A...C... |
| FVB/NJ                 | -                | ...T...A... | ...C...   | ...CCCCGCGTCGG...           | ...A...                   | ...G...              | ...A...              | ...TG...  | ...A...C... |
| SWR/J                  | -                | ...T...A... | ...C...   | ...CCCCGCGTCGG...           | ...A...                   | ...G...              | ...A...              | ...TG...  | ...A...C... |
| C3H/HeOuj              | -                | ...T...A... | ...C...   | ...CCCCGCGTCGG...           | ...A...                   | ...G...              | ...A...              | ...TG...  | ...A...C... |
| RIIS/J                 | -                | ...T...A... | ...C...   | ...CCCCGCGTCGG...           | ...A...                   | ...G...              | ...A...              | ...TG...  | ...A...C... |
| SM/J                   | -                | ...T...A... | ...C...   | ...CCCCGCGTCGG...           | ...A...                   | ...G...              | ...A...              | ...TG...  | ...A...C... |
| 129T2/Sv EmsJ          | -                | ...T...A... | ...C...   | ...CCCCGCGTCGG...           | ...A...                   | ...G...              | ...A...              | ...TG...  | ...A...C... |
| NON/LtJ                | -                | ...T...A... | ...C...   | ...CCCCGCGTCGG...           | ...A...                   | ...G...              | ...A...              | ...TG...  | ...A...C... |
| SJL/J                  | -                | ...T...A... | ...C...   | ...CCCCGCGTCGG...           | ...A...                   | ...G...              | ...A...              | ...TG...  | ...A...C... |
| NZW/LacJ               | -                | ...T...A... | ...C...   | ...CCCCGCGTCGG...           | ...A...                   | ...G...              | ...A...              | ...TG...  | ...A...C... |
| 129S6/SvEvTac          | -                | ...T...A... | ...C...   | ...CCCCGCGTCGG...           | ...A...                   | ...G...              | ...A...              | ...TG...  | ...A...C... |
| SEC/1ReJ               | -                | ...T...A... | ...C...   | ...CCCCGCGTCGG...           | ...A...                   | ...A...              | ...A...              | ...TG...  | ...A...C... |
| BDP/J                  | -                | ...T...A... | ...C...   | ...CCCCGCGTCGG...           | ...A...                   | ...A...              | ...A...              | ...TG...  | ...A...C... |
| SHR/GnEi               | -                | ...T...A... | ...C...   | ...CCCCGCGTCGG...           | ...A...                   | ...A...              | ...A...              | ...TG...  | ...A...C... |
| C3H/HeSnJ              | +                | ...T...A... | ...C...   | ...CCCCGCGTCGG...           | ...A...                   | ...G...              | ...A...              | ...TG...  | ...A...C... |
| I/LnJ                  | +                | ...T...A... | ...C...   | ...CCCCGCGTCGG...           | ...A...                   | ...G...              | ...A...              | ...TG...  | ...A...C... |
| YBR/Ei                 | +                | ...T...A... | ...C...   | ...CCCCGCGTCGG...           | ...A...                   | ...G...              | ...A...              | ...TG...  | ...A...C... |
| MRL/MpJ                | +                | ...T...A... | ...C...   | ...CCCCGCGTCGG...           | ...A...                   | ...G...              | ...A...              | ...TG...  | ...A...C... |
| CD1                    | +                | ...T...A... | ...C...   | ...CCCCGCGTCGG...           | ...A...                   | ...A...              | ...A...              | ...TG...  | ...A...C... |
| RBF/DnJ*               | +                | ...T...A... | ...C...   | ...CCCCGCGTCGG...           | ...A...                   | ...A...              | ...A...              | ...TG...  | ...A...C... |
| PL/J                   | +                | ...T...A... | ...C...   | ...CCCCGCGTCGG...           | ...A...                   | ...A...              | ...A...              | ...TG...  | ...A...C... |
| AKR/J*                 | +                | ...T...A... | ...C...   | ...CCCCGCGTCGG...           | ...A...                   | ...A...              | ...A...              | ...TG...  | ...A...C... |
| RF/J                   | +                | ...T...A... | ...C...   | ...CCCCGCGTCGG...           | ...A...                   | ...A...              | ...A...              | ...TG...  | ...A...C... |
| BALB/cByJ <sup>f</sup> | +                | ...T...A... | ...C...   | ...CCCCGCGTCGG...           | ...A...                   | ...A...              | ...A...              | ...TG...  | ...A...C... |
| A/WySnJ                | +                | ...T...A... | ...C...   | ...CCCCGCGTCGG...           | ...A...                   | ...A...              | ...A...              | ...TG...  | ...A...C... |
| P/J                    | +                | ...T...A... | ...C...   | ...CCCCGCGTCGG...           | ...A...                   | ...A...              | ...A...              | ...TG...  | ...A...C... |
| SENCARA/PtJ            | +                | ...T...A... | ...C...   | ...CCCCGCGTCGG...           | ...A...                   | ...A...              | ...A...              | ...TG...  | ...A...C... |
| DBA/1J                 | +                | ...T...A... | ...C...   | ...CCCCGCGTCGG...           | ...A...                   | ...A...              | ...A...              | ...TG...  | ...A...C... |
| ALS/LtJ                | +                | ...T...A... | ...C...   | ...CCCCGCGTCGG...           | ...A...                   | ...A...              | ...A...              | ...TG...  | ...A...C... |
| C58/J                  | +                | ...T...A... | ...C...   | ...CCCCGCGTCGG...           | ...A...                   | ...A...              | ...A...              | ...TG...  | ...A...C... |
| C57BLKS/J              | +                | ...T...A... | ...C...   | ...CCCCGCGTCGG...           | ...A...                   | ...A...              | ...A...              | ...TG...  | ...A...C... |
| 129/ReJ <sup>f</sup>   | +                | ...T...A... | ...C...   | ...CCCCGCGTCGG...           | ...A...                   | ...A...              | ...A...              | ...TG...  | ...A...C... |
| C57BR/cdJ <sup>f</sup> | +                | ...T...A... | ...C...   | ...CCCCGCGTCGG...           | ...A...                   | ...A...              | ...A...              | ...TG...  | ...A...C... |
| SKH2/J <sup>f</sup>    | +                | ...T...A... | ...C...   | ...CCCCGCGTCGG...           | ...A...                   | ...A...              | ...A...              | ...TG...  | ...A...C... |
| BUB/BnJ <sup>f</sup>   | +                | ...T...A... | ...C...   | ...CCCCGCGTCGG...           | ...A...                   | ...A...              | ...A...              | ...TG...  | ...A...C... |
| MA/MyJ                 | +                | ...T...A... | ...C...   | ...CCCCGCGTCGG...           | ...A...                   | ...A...              | ...A...              | ...TG...  | ...A...C... |
| LP/J                   | +                | ...T...A... | ...C...   | ...CCCCGCGTCGG...           | ...A...                   | ...A...              | ...A...              | ...TG...  | ...A...C... |
| 129/SvJ                | +                | ...T...A... | ...C...   | ...CCCCGCGTCGG...           | ...A...                   | ...A...              | ...A...              | ...TG...  | ...A...C... |
| NOR/LtJ                | +                | ...T...A... | ...C...   | ...CCCCGCGTCGG...           | ...A...                   | ...A...              | ...A...              | ...TG...  | ...A...C... |
| A/J <sup>f</sup>       | +                | ...T...A... | ...C...   | ...CCCCGCGTCGG...           | ...A...                   | ...A...              | ...A...              | ...TG...  | ...A...C... |
| C57BL/6J               | +                | ...T...A... | ...C...   | ...CCCCGCGTCGG...           | ...A...                   | ...A...              | ...A...              | ...TG...  | ...A...C... |
| NOD/LtJ                | +                | ...T...A... | ...C...   | ...CCCCGCGTCGG...           | ...A...                   | ...A...              | ...A...              | ...TG...  | ...A...C... |
| DBA/2J                 | +                | ...T...A... | ...C...   | ...CCCCGCGTCGG...           | ...A...                   | ...A...              | ...A...              | ...TG...  | ...A...C... |
| ALR/LtJ                | +                | ...T...A... | ...C...   | ...CCCCGCGTCGG...           | ...A...                   | ...A...              | ...A...              | ...TG...  | ...A...C... |
| C57LJ                  | +                | ...T...A... | ...C...   | ...CCCCGCGTCGG...           | ...A...                   | ...A...              | ...A...              | ...TG...  | ...A...C... |

CZECHII/Ei, MOLF/Ei, CAST/Ei and SF/CamEi are representative substrains of *M. m. musculus*, *M. m. castaneus*, *M. m. molossinus*, and *M. m. domesticus*.

<sup>†</sup> Assessed by ABR analyses (ref. Zheng, Q.Y., Johnson, K.R., & Erway, L.C. *Hear. Res.* **130**, 94-107 (1999)).

\* These strains were 'sensitized' with a loss-of-function allele of *Atp2b2* and classified as AHL-negative (CE/J, LG/J) and AHL-positive (AKR/J, RBF/DnJ).

<sup>†</sup> These strains demonstrate linkage with *ahl*.

<sup>‡</sup> These strains are allelic with *mdfw*.

na, not applicable; note that laboratory strains share the same haplotype across the *ahl* interval (shaded box).
