# Supplementary material
Source: PubMed Central journal article supplement (PMC2864026)
Supplement: NIHMS197168-supplement-S__Table_3.pdf [file NIHMS197168-supplement-S__Table_3.pdf]

### Supplementary Table 3

#### ABR thresholds associated with *Atp2b2*<sup>dfw-2J</sup>, *Cdh23*<sup>753G/A</sup> and *Cdh23*<sup>v</sup> alleles

| Genotype                          |                                   | click   | 8kHz    | 6kHz    | 32kHz   | n  | age | Genetic Background                                 |
|-----------------------------------|-----------------------------------|---------|---------|---------|---------|----|-----|----------------------------------------------------|
| <i>Atp2b2</i> <sup>+/+</sup>      | <i>Cdh23</i> <sup>753A/753A</sup> | 79 ± 8  | 80 ± 9  | 81 ± 13 | 93 ± 12 | 14 | 6   | [(V/Le- <i>v/v</i> x BUB/BnJ) x BUB/BnJ] N3        |
| <i>Atp2b2</i> <sup>+/+</sup>      | <i>Cdh23</i> <sup>753A/v</sup>    | 87 ± 8  | 87 ± 14 | 87 ± 11 | 98 ± 4  | 7  | 6   | [(V/Le- <i>v/v</i> x BUB/BnJ) x BUB/BnJ] N3        |
| <i>Atp2b2</i> <sup>+/+</sup>      | <i>Cdh23</i> <sup>753G/753G</sup> | 38 ± 8  | 33 ± 5  | 23 ± 10 | 51 ± 7  | 15 | 6   | [(V/Le- <i>v/v</i> x BUB/BnJ) x CBA/CaJ] F1N2      |
| <i>Atp2b2</i> <sup>+/+</sup>      | <i>Cdh23</i> <sup>753G/v</sup>    | 37 ± 5  | 35 ± 10 | 22 ± 8  | 48 ± 8  | 14 | 6   | [(V/Le- <i>v/v</i> x BUB/BnJ) x CBA/CaJ] F1N2      |
| <i>Atp2b2</i> <sup>+/dfw-2J</sup> | <i>Cdh23</i> <sup>753A/753A</sup> | 90 ± 17 | 90 ± 17 | 82 ± 19 | 93 ± 12 | 3  | 4   | (V/Le- <i>+/v</i> x BALB/cByJ- <i>+/dfw2J</i> ) F1 |
| <i>Atp2b2</i> <sup>+/dfw-2J</sup> | <i>Cdh23</i> <sup>753A/v</sup>    | 100     | 100     | 93 ± 3  | 100     | 3  | 4   | (V/Le- <i>+/v</i> x BALB/cByJ- <i>+/dfw2J</i> ) F1 |
| <i>Atp2b2</i> <sup>+/+</sup>      | <i>Cdh23</i> <sup>753A/v</sup>    | 35      | 45      | 20      | 40      | 1  | 4   | (V/Le- <i>+/v</i> x BALB/cByJ- <i>+/dfw2J</i> ) F1 |

kHz, kiloHerz; n, number of animals tested at weeks of age; thresholds are in decibel sound pressure levels ± S.E.
